# Supplementary material for: Challenging Popular Belief, Mosquito Larvae Breathe Underwater
Source: MDPI journal article supplement (doi:10.3390/insects15020099), 2024-02-01
Supplement: s1 [file s1]

Supplementary material

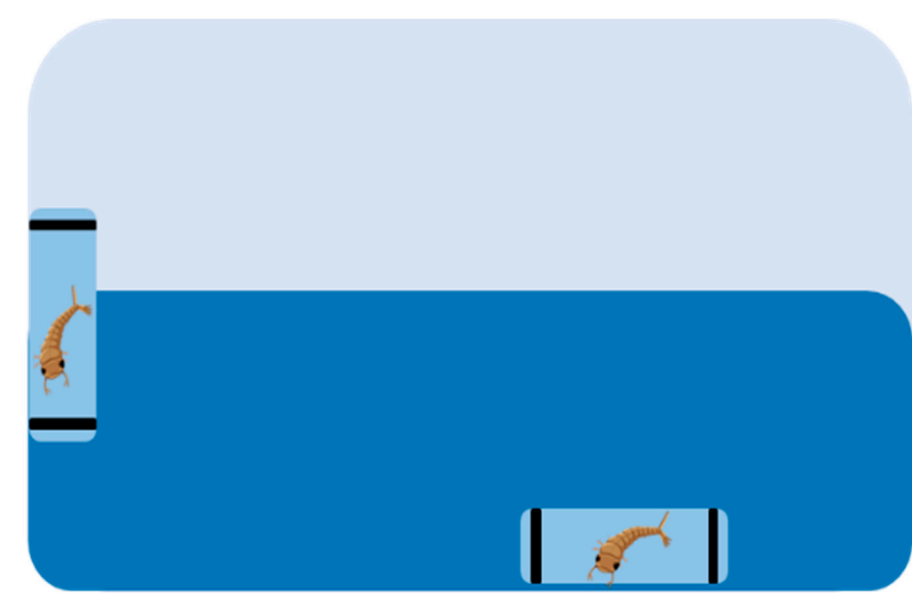

Figure S1. Setup for testing larval survival at different temperatures.

Table S1. Species, stages, vial conditions and medium (water and air) where the oxygen consumption was measured at 25°C.

|                       | <i>Aedes aegypti</i> |             | <i>Aedes albopictus</i> |
|-----------------------|----------------------|-------------|-------------------------|
|                       | Larvae               | Pupae       | Larvae                  |
| Submerged condition   | Water                | Water       | Water                   |
| Closed vial condition | Water + Air          | Water + Air | Water + Air             |
| Open vial condition   | Water                | Water       | ---                     |

Table S2. Oxygen consumption measurements for Q<sub>10</sub> calculations at 15°, 25° and 35°C.

|                       | <i>Aedes aegypti</i> larvae | <i>Aedes albopictus</i> larvae |
|-----------------------|-----------------------------|--------------------------------|
| Submerged condition   | Water                       | Water                          |
| Closed vial condition | Air                         | ---                            |
