# Supplementary material for: Challenging Popular Belief, Mosquito Larvae Breathe Underwater
Source: Insects. 2024 Feb 1;15(2):99. doi: 10.3390/insects15020099 (PMC10889830; doi:10.3390/insects15020099)
Supplement: Supplementary file 1 [file insects-15-00099-s001.zip › insects-2688262-data set.xlsx]

## Sheet: Data Fig 1
Data Figure 1: Survival of Ae. aegypti larvae: control and submerged treatments at three temperatures: 15°, 25°, and 35°C.
		0: Larvae that pupate or was alive at the end of the assay
		1: Death
	Days	Control 25°C	Submerged 25°C	Control 35°C	Submerged 35 °C	Control 15°C	Submerged 15°C	State of censored events
	7	0						Pupate
	29	0						Alive
	8	0						Pupate
	7	0						Pupate
	3	0						Pupate
	1	0						Pupate
	29	0						Alive
	29	0						Alive
	2	0						Pupate
	4	0						Pupate
	22	0						Alive
	21	0						Alive
	22	0						Alive
	4	0						Pupate
	22	0						Alive
	7	0						Pupate
	21	0						Alive
	1	0						Pupate
	4	0						Pupate
	22	0						Alive
	25	0						Alive
	2		1
	16		1
	14		1
	29		0					Alive
	3		1
	2		1
	1		1
	6		1
	10		1
	19		1
	6		1
	10		1
	1		1
	1		1
	10		1
	0		1
	11		0					Alive
	4		1
	0		1
	8		0					Alive
	2		1
	22		0					Alive
	4		1
	1		1
	19		0					Alive
	26		1
	22		0					Alive
	10		1
	6		1
	9		0					Alive
	9		1
	12		0					Alive
	18		0					Alive
	6		1
	20		0					Alive
	27		0					Alive
	13			1
	12			0				Pupate
	12			1
	3			1
	9			0				Pupate
	4			0				Pupate
	13			1
	9			1
	3			1
	14			1
	5			0				Alive
	4			1
	4			1
	5			0				Alive
	4			1
	4			0				Alive
	1				1
	9				1
	2				1
	2				1
	4				1
	4				1
	9				1
	9				1
	1				1
	1				1
	7				1
	6				1
	2				1
	4				1
	3				1
	4				1
	3				1
	4				1
	3				0			Alive
	2				1
	3				0			Alive
	6					1
	8					1
	11					1
	41					0		Alive
	41					0		Alive
	7					1
	9					1
	50					1
	3					1
	39					0		Alive
	34					0		Pupate
	8						1
	66						1
	58						1
	31						0	Alive
	41						1
	58						1
	36						1

## Sheet: Data Fig 2
Data Figure 2: Consumption of water-dissolved O2 by Ae. aegypti larvae and pupae under three conditions: submerged, closed vial and open vial.
	Stage	Vial Condition	MR (µmoles/h)	Treatment
	Larvae	Submerged	0.045753	Submerged
	Larvae	Submerged	0.039514	Submerged
	Larvae	Submerged	0.035355	Submerged
	Larvae	Submerged	0.060311	Submerged
	Larvae	Submerged	0.041594	Submerged
	Larvae	Submerged	0.029116	Submerged
	Larvae	Submerged	0.047833	Submerged
	Larvae	Submerged	0.039514	Submerged
	Larvae	Submerged	0.029116	Submerged
	Larvae	Submerged	0.029116	Submerged
	Larvae	Submerged	0.118542	Submerged
	Larvae	Submerged	0.118542	Submerged
	Larvae	Submerged	0.049913	Submerged
	Larvae	Submerged	0.041594	Submerged
	Larvae	Submerged	0.047833	Submerged
	Larvae	Submerged	0.056152	Submerged
	Larvae	Submerged	0.045753	Submerged
	Larvae	Submerged	0.043673	Submerged
	Larvae	Submerged	0.037434	Submerged
	Larvae	Submerged	0.06863	Submerged
	Larvae	Submerged	0.054072	Submerged
	Larvae	Submerged	0.060311	Submerged
	Larvae	Submerged	0.062391	Submerged
	Larvae	Submerged	0.074869	Submerged
	Larvae	Submerged	0.060311	Submerged
	Larvae	Submerged	0.054072	Submerged
	Larvae	Submerged	0.041594	Submerged
	Larvae	Submerged	0.047833	Submerged
	Larvae	Submerged	0.039514	Submerged
	Larvae	Submerged	0.051992	Submerged
	Larvae	Submerged	0.043673	Submerged
	Larvae	Submerged	0.056152	Submerged
	Larvae	Submerged	0.039514	Submerged
	Larvae	Submerged	0.037434	Submerged
	Larvae	Submerged	0.043673	Submerged
	Larvae	Submerged	0.039514	Submerged
	Larvae	Submerged	0.047833	Submerged
	Larvae	Submerged	0.033275	Submerged
	Larvae	Submerged	0.041594	Submerged
	Larvae	Submerged	0.041594	Submerged
	Larvae	Submerged	0.047833	Submerged
	Larvae	Submerged	0.037434	Submerged
	Larvae	Submerged	0.027036	Submerged
	Larvae	Submerged	0.039514	Submerged
	Larvae	Submerged	0.06655	Submerged
	Larvae	Submerged	0.043673	Submerged
	Larvae	Submerged	0.051992	Submerged
	Larvae	Submerged	0.062391	Submerged
	Larvae	Submerged	0.049913	Submerged
	Larvae	Submerged	0.049913	Submerged
	Larvae	Submerged	0.051992	Submerged
	Larvae	Submerged	0.0873	Submerged
	Larvae	Submerged	0.0686	Submerged
	Larvae	Submerged	0.0541	Submerged
	Larvae	Submerged	0.0541	Submerged
	Larvae	Submerged	0.0645	Submerged
	Larvae	Submerged	0.0499	Submerged
	Larvae	Submerged	0.0354	Submerged
	Larvae	Submerged	0.0541	Submerged
	Larvae	Submerged	0.027	Submerged
	Larvae	Submerged	0.0603	Submerged
	Larvae	Submerged	0.0437	Submerged
	Larvae	Submerged	0.0333	Submerged
	Larvae	Submerged	0.0312	Submerged
	Larvae	Submerged	0.0312	Submerged
	Larvae	Submerged	0.0312	Submerged
	Larvae	Submerged	0.0374	Submerged
	Larvae	Submerged	0.0416	Submerged
	Larvae	Submerged	0.0458	Submerged
	Larvae	Submerged	0.0374	Submerged
	Larvae	Closed vial	0.022877
	Larvae	Closed vial	0.024956
	Larvae	Closed vial	0.009359
	Larvae	Closed vial	0.016638
	Larvae	Closed vial	0.019757
	Larvae	Closed vial	0.022877
	Larvae	Closed vial	0.014558
	Larvae	Closed vial	0.017677
	Larvae	Closed vial	0.008735
	Larvae	Closed vial	0.021837
	Larvae	Closed vial	0.010398
	Larvae	Closed vial	0.010294
	Larvae	Closed vial	0.024956
	Larvae	Closed vial	0.009151
	Larvae	Closed vial	0.010086
	Larvae	Closed vial	0.013518
	Larvae	Closed vial	0.011438
	Larvae	Closed vial	0.014558
	Larvae	Closed vial	0.017677
	Larvae	Closed vial	0.016638
	Larvae	Closed vial	0.021837
	Larvae	Closed vial	0.011438
	Larvae	Closed vial	0.018717
	Larvae	Closed vial	0.008215
	Larvae	Closed vial	0.017677
	Larvae	Closed vial	0.006343
	Larvae	Closed vial	0.010398
	Larvae	Closed vial	0.015598
	Larvae	Closed vial	0.018717
	Larvae	Closed vial	0.018717
	Larvae	Closed vial	0.017677
	Larvae	Closed vial	0.014558
	Larvae	Closed vial	0.018717
	Larvae	Closed vial	0.013518
	Larvae	Closed vial	0.012478
	Larvae	Closed vial	0.011438
	Larvae	Closed vial	0.014558
	Larvae	Closed vial	0.013518
	Larvae	Closed vial	0.011438
	Larvae	Closed vial	0.0138
	Larvae	Closed vial	0.0096
	Larvae	Closed vial	0.0143
	Larvae	Closed vial	0.0114
	Larvae	Closed vial	0.007
	Larvae	Closed vial	0.0127
	Larvae	Closed vial	0.0107
	Larvae	Closed vial	0.0107
	Larvae	Closed vial	0.006
	Larvae	Closed vial	0.0135
	Larvae	Closed vial	0.0156
	Larvae	Closed vial	0.0312
	Larvae	Closed vial	0.0096
	Larvae	Closed vial	0.006
	Larvae	Closed vial	0.0078
	Larvae	Closed vial	0.0187
	Larvae	Closed vial	0.0159
	Larvae	Closed vial	0.0143
	Larvae	Closed vial	0.0146
	Larvae	Closed vial	0.0078
	Larvae	Open vial	0.022877
	Larvae	Open vial	0.014558
	Larvae	Open vial	0.019757
	Larvae	Open vial	0.017677
	Larvae	Open vial	0.022877
	Larvae	Open vial	0.025996
	Larvae	Open vial	0.027036
	Larvae	Open vial	0.011438
	Larvae	Open vial	0.005199
	Larvae	Open vial	0.010398
	Larvae	Open vial	0.014558
	Larvae	Open vial	0.015598
	Larvae	Open vial	0.01019
	Larvae	Open vial	0.012478
	Larvae	Open vial	0.013518
	Larvae	Open vial	0.013518
	Larvae	Open vial	0.014558
	Larvae	Open vial	0.009151
	Larvae	Open vial	0.012478
	Larvae	Open vial	0.000697
	Larvae	Open vial	0.013518
	Larvae	Open vial	0.003951
	Larvae	Open vial	0.013518
	Larvae	Open vial	0.006967
	Larvae	Open vial	0.008735
	Larvae	Open vial	0.009151
	Larvae	Open vial	0.007591
	Larvae	Open vial	0.011438
	Larvae	Open vial	0.011438
	Larvae	Open vial	0.015598
	Larvae	Open vial	0.024956
	Larvae	Open vial	0.019549
	Larvae	Open vial	0.022877
	Larvae	Open vial	0.020797
	Larvae	Open vial	0.022877
	Larvae	Open vial	0.015182
	Larvae	Open vial	0.01643
	Larvae	Open vial	0.017469
	Larvae	Open vial	0.017053
	Pupae	Submerged	0.019133
	Pupae	Submerged	0.01227
	Pupae	Submerged	0.017261
	Pupae	Submerged	0.012894
	Pupae	Submerged	0.011022
	Pupae	Submerged	0.015806
	Pupae	Submerged	0.029116
	Pupae	Submerged	0.018093
	Pupae	Submerged	0.024956
	Pupae	Submerged	0.024956
	Pupae	Submerged	0.017261
	Pupae	Submerged	0.037434
	Pupae	Submerged	0.047833
	Pupae	Submerged	0.029116
	Pupae	Submerged	0.037434
	Pupae	Submerged	0.051992
	Pupae	Submerged	0.047833
	Pupae	Submerged	0.033275
	Pupae	Submerged	0.018301
	Pupae	Submerged	0.015806
	Pupae	Submerged	0.016222
	Pupae	Submerged	0.022877
	Pupae	Submerged	0.041594
	Pupae	Submerged	0.045753
	Pupae	Submerged	0.020797
	Pupae	Submerged	0.010606
	Pupae	Submerged	0.031195
	Pupae	Submerged	0.029116
	Pupae	Submerged	0.019965
	Pupae	Submerged	0.00208
	Pupae	Submerged	0.01123
	Pupae	Submerged	0.060311
	Pupae	Submerged	0.029116
	Pupae	Closed vial	0.012478
	Pupae	Closed vial	0.006967
	Pupae	Closed vial	0.004991
	Pupae	Closed vial	0.007903
	Pupae	Closed vial	0.005511
	Pupae	Closed vial	0.009047
	Pupae	Closed vial	4.06e-05
	Pupae	Closed vial	0.006655
	Pupae	Closed vial	0.005927
	Pupae	Closed vial	0.007799
	Pupae	Closed vial	0.006343
	Pupae	Closed vial	0.007487
	Pupae	Closed vial	0.004887
	Pupae	Closed vial	0.003951
	Pupae	Closed vial	0.004367
	Pupae	Closed vial	0.004159
	Pupae	Closed vial	0.004887
	Pupae	Closed vial	0.00312
	Pupae	Closed vial	0.005199
	Pupae	Closed vial	0.004471
	Pupae	Closed vial	0.006759
	Pupae	Closed vial	0.006551
	Pupae	Closed vial	0.009359
	Pupae	Closed vial	0.010398
	Pupae	Closed vial	0.01019
	Pupae	Closed vial	0.012478
	Pupae	Closed vial	0.002288
	Pupae	Closed vial	0.009255
	Pupae	Closed vial	0.008943
	Pupae	Closed vial	0.006551
	Pupae	Closed vial	0.010398
	Pupae	Closed vial	0.003535
	Pupae	Closed vial	0.001664
	Pupae	Open vial	0.005303
	Pupae	Open vial	0.007071
	Pupae	Open vial	0.009775
	Pupae	Open vial	0.014558
	Pupae	Open vial	0.011438
	Pupae	Open vial	0.011438
	Pupae	Open vial	0.013518
	Pupae	Open vial	0.005095
	Pupae	Open vial	0.005199
	Pupae	Open vial	0.013518
	Pupae	Open vial	0.002912
	Pupae	Open vial	0.004263
	Pupae	Open vial	0.003951
	Pupae	Open vial	0.008735
	Pupae	Open vial	0.005199
	Pupae	Open vial	0.006343
	Pupae	Open vial	0.000936
	Pupae	Open vial	0.004055
	Pupae	Open vial	0.003328
	Pupae	Open vial	0.002184
	Pupae	Open vial	0.002704
	Pupae	Open vial	0.001976
	Pupae	Open vial	0.004575
	Pupae	Open vial	0.005303
	Pupae	Open vial	0.006239
	Pupae	Open vial	0.004887
	Pupae	Open vial	0.006239
	Pupae	Open vial	0.00025
	Pupae	Open vial	0.006239
	Pupae	Open vial	0.008735
	Pupae	Open vial	0.009359

## Sheet: Data Fig 3
Data Figure 3: O2 consumption obtained from air and water of Ae. aegypti larvae and pupae in the closed vial condition.
	Stage	Medium	TM (µmoles/h)	Medium
	Larvae	Air	0.124781	Air
	Larvae	Air	0.13518	Air
	Larvae	Air	0.06863	Air
	Larvae	Air	0.13518	Air
	Larvae	Air	0.239164	Air
	Larvae	Air	0.218367	Air
	Larvae	Air	0.166375	Air
	Larvae	Air	0.124781	Air
	Larvae	Air	0.114383	Air
	Larvae	Air	0.270359	Air
	Larvae	Air	0.103984	Air
	Larvae	Air	0.073829	Air
	Larvae	Air	0.034315	Air
	Larvae	Air	0.083188	Air
	Larvae	Air	0.077988	Air
	Larvae	Air	0.13518	Air
	Larvae	Air	0.19757	Air
	Larvae	Air	0.145578	Air
	Larvae	Air	0.145578	Air
	Larvae	Air	0.083188	Air
	Larvae	Air	0.076948	Air
	Larvae	Air	0.13518	Air
	Larvae	Air	0.086307	Air
	Larvae	Air	0.083188	Air
	Larvae	Air	0.00078	Air
	Larvae	Air	0.020797	Air
	Larvae	Air	0.103984	Air
	Larvae	Air	0.124781	Air
	Larvae	Air	0.13518	Air
	Larvae	Air	0.087347	Air
	Larvae	Air	0.155977	Air
	Larvae	Air	0.06967	Air
	Larvae	Air	0.114383	Air
	Larvae	Air	0.100865	Air
	Larvae	Air	0.084227	Air
	Larvae	Air	0.0598	Air
	Larvae	Air	0.0806	Air
	Larvae	Air	0.1066	Air
	Larvae	Air	0.078	Air
	Larvae	Air	0.0624	Air
	Larvae	Air	0.0884	Air
	Larvae	Air	0.0624	Air
	Larvae	Air	0.0442	Air
	Larvae	Air	0.0676	Air
	Larvae	Air	0.0572	Air
	Larvae	Air	0.052	Air
	Larvae	Air	0.1326	Air
	Larvae	Air	0.091	Air
	Larvae	Air	0.0936	Air
	Larvae	Air	0.0494	Air
	Larvae	Air	0.0598	Air
	Larvae	Air	0.1326	Air
	Larvae	Air	0.0702	Air
	Larvae	Air	0.0494	Air
	Larvae	Air	0.0014	Air
	Larvae	Air	0.0312	Air
	Larvae	Air	0.0572	Air
	Larvae	Air	0.065	Air
	Larvae	Air	0.0624	Air
	Larvae	Water	0.022877
	Larvae	Water	0.024956
	Larvae	Water	0.009359
	Larvae	Water	0.016638
	Larvae	Water	0.019757
	Larvae	Water	0.022877
	Larvae	Water	0.014558
	Larvae	Water	0.017677
	Larvae	Water	0.008735
	Larvae	Water	0.021837
	Larvae	Water	0.010398
	Larvae	Water	0.010294
	Larvae	Water	0.024956
	Larvae	Water	0.009151
	Larvae	Water	0.010086
	Larvae	Water	0.013518
	Larvae	Water	0.011438
	Larvae	Water	0.014558
	Larvae	Water	0.017677
	Larvae	Water	0.016638
	Larvae	Water	0.021837
	Larvae	Water	0.011438
	Larvae	Water	0.018717
	Larvae	Water	0.008215
	Larvae	Water	0.017677
	Larvae	Water	0.006343
	Larvae	Water	0.010398
	Larvae	Water	0.015598
	Larvae	Water	0.018717
	Larvae	Water	0.018717
	Larvae	Water	0.017677
	Larvae	Water	0.014558
	Larvae	Water	0.018717
	Larvae	Water	0.013518
	Larvae	Water	0.012478
	Larvae	Water	0.011438
	Larvae	Water	0.014558
	Larvae	Water	0.013518
	Larvae	Water	0.011438
	Larvae	Water	0.0138
	Larvae	Water	0.0096
	Larvae	Water	0.0143
	Larvae	Water	0.0114
	Larvae	Water	0.007
	Larvae	Water	0.0127
	Larvae	Water	0.0107
	Larvae	Water	0.0107
	Larvae	Water	0.006
	Larvae	Water	0.0135
	Larvae	Water	0.0156
	Larvae	Water	0.0312
	Larvae	Water	0.0096
	Larvae	Water	0.006
	Larvae	Water	0.0078
	Larvae	Water	0.0187
	Larvae	Water	0.0159
	Larvae	Water	0.0143
	Larvae	Water	0.0146
	Larvae	Water	0.0078
	Pupae	Air	0.088387
	Pupae	Air	0.124781
	Pupae	Air	0.101905
	Pupae	Air	0.074869
	Pupae	Air	0.06759
	Pupae	Air	0.103984
	Pupae	Air	0.19757
	Pupae	Air	0.187172
	Pupae	Air	0.114383
	Pupae	Air	0.145578
	Pupae	Air	0.124781
	Pupae	Air	0.228766
	Pupae	Air	0.145578
	Pupae	Air	0.090466
	Pupae	Air	0.145578
	Pupae	Air	0.166375
	Pupae	Air	0.114383
	Pupae	Air	0.13518
	Pupae	Air	0.166375
	Pupae	Air	0.083188
	Pupae	Air	0.145578
	Pupae	Air	0.155977
	Pupae	Air	0.045753
	Pupae	Air	0.042634
	Pupae	Air	0.06447
	Pupae	Air	0.13518
	Pupae	Air	0.114383
	Pupae	Air	0.114383
	Pupae	Air	0.097745
	Pupae	Air	0.017677
	Pupae	Air	0.155977
	Pupae	Air	0.155977
	Pupae	Air	0.145578
	Pupae	Water	0.002288
	Pupae	Water	0.009255
	Pupae	Water	0.008943
	Pupae	Water	0.006551
	Pupae	Water	0.010398
	Pupae	Water	0.012478
	Pupae	Water	0.003535
	Pupae	Water	0.001664
	Pupae	Water	0.012478
	Pupae	Water	0.006967
	Pupae	Water	0.004991
	Pupae	Water	0.007903
	Pupae	Water	0.005511
	Pupae	Water	0.009047
	Pupae	Water	4.06e-05
	Pupae	Water	0.006655
	Pupae	Water	0.005927
	Pupae	Water	0.007799
	Pupae	Water	0.006343
	Pupae	Water	0.007487
	Pupae	Water	0.004887
	Pupae	Water	0.003951
	Pupae	Water	0.004367
	Pupae	Water	0.004159
	Pupae	Water	0.004887
	Pupae	Water	0.00312
	Pupae	Water	0.005199
	Pupae	Water	0.004471
	Pupae	Water	0.006759
	Pupae	Water	0.006551
	Pupae	Water	0.009359
	Pupae	Water	0.010398
	Pupae	Water	0.01019

## Sheet: Data Fig 4
Data Figure 4: Total O2 consumption of Ae. aegypti larvae and pupae with (dual) and without (submerged) access to air.
	Stage	Treatment	TM (µmoles/h)
	Larvae	Submerged	0.0873
	Larvae	Submerged	0.0686
	Larvae	Submerged	0.0541
	Larvae	Submerged	0.0541
	Larvae	Submerged	0.0645
	Larvae	Submerged	0.0499
	Larvae	Submerged	0.0354
	Larvae	Submerged	0.0541
	Larvae	Submerged	0.027
	Larvae	Submerged	0.0603
	Larvae	Submerged	0.0437
	Larvae	Submerged	0.0333
	Larvae	Submerged	0.0312
	Larvae	Submerged	0.0312
	Larvae	Submerged	0.0312
	Larvae	Submerged	0.0374
	Larvae	Submerged	0.0416
	Larvae	Submerged	0.0458
	Larvae	Submerged	0.0374
	Larvae	Submerged	0.045753
	Larvae	Submerged	0.039514
	Larvae	Submerged	0.035355
	Larvae	Submerged	0.060311
	Larvae	Submerged	0.041594
	Larvae	Submerged	0.029116
	Larvae	Submerged	0.047833
	Larvae	Submerged	0.039514
	Larvae	Submerged	0.029116
	Larvae	Submerged	0.029116
	Larvae	Submerged	0.118542
	Larvae	Submerged	0.118542
	Larvae	Submerged	0.049913
	Larvae	Submerged	0.041594
	Larvae	Submerged	0.047833
	Larvae	Submerged	0.056152
	Larvae	Submerged	0.045753
	Larvae	Submerged	0.043673
	Larvae	Submerged	0.037434
	Larvae	Submerged	0.06863
	Larvae	Submerged	0.054072
	Larvae	Submerged	0.060311
	Larvae	Submerged	0.062391
	Larvae	Submerged	0.074869
	Larvae	Submerged	0.060311
	Larvae	Submerged	0.054072
	Larvae	Submerged	0.041594
	Larvae	Submerged	0.047833
	Larvae	Submerged	0.039514
	Larvae	Submerged	0.051992
	Larvae	Submerged	0.043673
	Larvae	Submerged	0.056152
	Larvae	Submerged	0.039514
	Larvae	Submerged	0.037434
	Larvae	Submerged	0.043673
	Larvae	Submerged	0.039514
	Larvae	Submerged	0.047833
	Larvae	Submerged	0.033275
	Larvae	Submerged	0.041594
	Larvae	Submerged	0.041594
	Larvae	Submerged	0.047833
	Larvae	Submerged	0.037434
	Larvae	Submerged	0.027036
	Larvae	Submerged	0.039514
	Larvae	Submerged	0.06655
	Larvae	Submerged	0.043673
	Larvae	Submerged	0.051992
	Larvae	Submerged	0.062391
	Larvae	Submerged	0.049913
	Larvae	Submerged	0.049913
	Larvae	Submerged	0.051992
	Larvae	Closed vial	0.147658
	Larvae	Closed vial	0.160136
	Larvae	Closed vial	0.077989
	Larvae	Closed vial	0.151818
	Larvae	Closed vial	0.258921
	Larvae	Closed vial	0.241244
	Larvae	Closed vial	0.180933
	Larvae	Closed vial	0.142458
	Larvae	Closed vial	0.123118
	Larvae	Closed vial	0.292196
	Larvae	Closed vial	0.114382
	Larvae	Closed vial	0.084123
	Larvae	Closed vial	0.059271
	Larvae	Closed vial	0.092339
	Larvae	Closed vial	0.088074
	Larvae	Closed vial	0.148698
	Larvae	Closed vial	0.209008
	Larvae	Closed vial	0.160136
	Larvae	Closed vial	0.163255
	Larvae	Closed vial	0.099826
	Larvae	Closed vial	0.098785
	Larvae	Closed vial	0.146618
	Larvae	Closed vial	0.105024
	Larvae	Closed vial	0.091403
	Larvae	Closed vial	0.018457
	Larvae	Closed vial	0.02714
	Larvae	Closed vial	0.114382
	Larvae	Closed vial	0.140379
	Larvae	Closed vial	0.153897
	Larvae	Closed vial	0.106064
	Larvae	Closed vial	0.173654
	Larvae	Closed vial	0.084228
	Larvae	Closed vial	0.1331
	Larvae	Closed vial	0.114383
	Larvae	Closed vial	0.096705
	Larvae	Closed vial	0.071238
	Larvae	Closed vial	0.095158
	Larvae	Closed vial	0.120118
	Larvae	Closed vial	0.089438
	Larvae	Closed vial	0.0762
	Larvae	Closed vial	0.098
	Larvae	Closed vial	0.0767
	Larvae	Closed vial	0.0556
	Larvae	Closed vial	0.0746
	Larvae	Closed vial	0.0699
	Larvae	Closed vial	0.0627
	Larvae	Closed vial	0.1433
	Larvae	Closed vial	0.097
	Larvae	Closed vial	0.1071
	Larvae	Closed vial	0.065
	Larvae	Closed vial	0.091
	Larvae	Closed vial	0.1422
	Larvae	Closed vial	0.0762
	Larvae	Closed vial	0.0572
	Larvae	Closed vial	0.0201
	Larvae	Closed vial	0.0471
	Larvae	Closed vial	0.0715
	Larvae	Closed vial	0.0796
	Larvae	Closed vial	0.0702
	Pupae	Submerged	0.019133
	Pupae	Submerged	0.01227
	Pupae	Submerged	0.017261
	Pupae	Submerged	0.012894
	Pupae	Submerged	0.011022
	Pupae	Submerged	0.015806
	Pupae	Submerged	0.029116
	Pupae	Submerged	0.018093
	Pupae	Submerged	0.024956
	Pupae	Submerged	0.024956
	Pupae	Submerged	0.017261
	Pupae	Submerged	0.037434
	Pupae	Submerged	0.047833
	Pupae	Submerged	0.029116
	Pupae	Submerged	0.037434
	Pupae	Submerged	0.051992
	Pupae	Submerged	0.047833
	Pupae	Submerged	0.033275
	Pupae	Submerged	0.018301
	Pupae	Submerged	0.015806
	Pupae	Submerged	0.016222
	Pupae	Submerged	0.022877
	Pupae	Submerged	0.041594
	Pupae	Submerged	0.045753
	Pupae	Submerged	0.020797
	Pupae	Submerged	0.010606
	Pupae	Submerged	0.031195
	Pupae	Submerged	0.029116
	Pupae	Submerged	0.019965
	Pupae	Submerged	0.00208
	Pupae	Submerged	0.01123
	Pupae	Submerged	0.060311
	Pupae	Submerged	0.029116
	Pupae	Closed vial	0.126861
	Pupae	Closed vial	0.152545
	Pupae	Closed vial	0.129773
	Pupae	Closed vial	0.153481
	Pupae	Closed vial	0.095978
	Pupae	Closed vial	0.154625
	Pupae	Closed vial	0.166416
	Pupae	Closed vial	0.121038
	Pupae	Closed vial	0.141107
	Pupae	Closed vial	0.174174
	Pupae	Closed vial	0.089531
	Pupae	Closed vial	0.153065
	Pupae	Closed vial	0.160864
	Pupae	Closed vial	0.048873
	Pupae	Closed vial	0.047833
	Pupae	Closed vial	0.068942
	Pupae	Closed vial	0.141939
	Pupae	Closed vial	0.120934
	Pupae	Closed vial	0.123741
	Pupae	Closed vial	0.108144
	Pupae	Closed vial	0.027868
	Pupae	Closed vial	0.167415
	Pupae	Closed vial	0.168455
	Pupae	Closed vial	0.157016
	Pupae	Closed vial	0.116151
	Pupae	Closed vial	0.106272
	Pupae	Closed vial	0.206825
	Pupae	Closed vial	0.196115
	Pupae	Closed vial	0.094938
	Pupae	Closed vial	0.13518
	Pupae	Closed vial	0.114383
	Pupae	Closed vial	0.078404
	Pupae	Closed vial	0.069254

## Sheet: Data Q10 A
Data Q10 of oxygen consumption from air of Ae. aegypti larvae
	Temperature (ºC)	TM (µmoles/h)
	15	0.00877628
	15	0.00906744
	15	0.0107312
	15	0.0205473
	15	0.0200482
	15	0.0133516
	15	0.0220863
	15	0.0198818
	15	0.0196738
	15	0.00944178
	15	0.00736209
	15	0.017095
	25	0.0220447	Q10
	25	0.028159	Q10
	25	0.0420097	Q10
	25	0.0358954	Q10
	25	0.0911319	Q10
	25	0.0362282	Q10
	25	0.0178853	Q10
	25	0.0247067	Q10
	25	0.0203809	Q10
	25	0.0298643	Q10
	25	0.0190499	Q10
	25	0.0261209	Q10
	35	0.0428416
	35	0.0515762
	35	0.0618083
	35	0.0593959
	35	0.043715
	35	0.0540303
	35	0.0254138
	35	0.035937
	35	0.0428416
	35	0.0511603
	35	0.0555277
	35	0.0451292

## Sheet: Data Q10 B 
Data Q10 of Ae. aegypti submerged larvae
	Temperature (ºC)	TM (µmoles/h)
	15	0.0229
	15	0.0312
	15	0.027
	15	0.027
	15	0.0291
	15	0.0458
	15	0.027
	15	0.0416
	15	0.0478
	15	0.0562
	15	0.027
	15	0.0374
	15	0
	15	0.0152
	15	0.027
	15	0.0177
	15	0.0666
	15	0.0333
	15	0.0437
	15	0.0229
	15	0.0395
	15	0.025
	15	0.0291
	15	0.027
	25	0.0873	Q10
	25	0.0686	Q10
	25	0.0541	Q10
	25	0.0541	Q10
	25	0.0645	Q10
	25	0.0499	Q10
	25	0.0354	Q10
	25	0.0541	Q10
	25	0.027	Q10
	25	0.0603	Q10
	25	0.0437	Q10
	25	0.0333	Q10
	25	0.0312	Q10
	25	0.0312	Q10
	25	0.0312	Q10
	25	0.0374	Q10
	25	0.0416	Q10
	25	0.0458	Q10
	25	0.0374	Q10
	25	0.0437	Q10
	25	0.0395	Q10
	25	0.025	Q10
	25	0.0312	Q10
	25	0.1019	Q10
	35	0.1102
	35	0.0977
	35	0.0707
	35	0.0832
	35	0.052
	35	0.0707
	35	0.0437
	35	0.0666
	35	0.052
	35	0.1123
	35	0.0645
	35	0.0915
	35	0.0333
	35	0.1061
	35	0.1061
	35	0.0562
	35	0.0915
	35	0.0416
	35	0.1206
	35	0.0624
	35	0.0769
	35	0.104
	35	0.0977
	35	0.0624

## Sheet: Data Fig 5
Data Figure 5: Consumption of O2 from water by Ae. albopictus larvae under two conditions: submerged and closed vial.
	Treatment	TM (µmoles/h)
	Submerged	0.0333
	Submerged	0.0312
	Submerged	0.0168
	Submerged	0.0229
	Submerged	0.0229
	Submerged	0.025
	Submerged	0.0291
	Submerged	0.027
	Submerged	0.0198
	Submerged	0.0312
	Submerged	0.0204
	Submerged	0.0229
	Submerged	0.027
	Submerged	0.0189
	Submerged	0.0148
	Submerged	0.0185
	Submerged	0.0206
	Submerged	0.016
	Submerged	0.0102
	Submerged	0.0229
	Submerged	0.025
	Submerged	0.025
	Submerged	0.016
	Submerged	0.0229
	Submerged	0.027
	Submerged	0.0229
	Submerged	0.0146
	Submerged	0.0229
	Closed vial	0.001
	Closed vial	0.0016
	Closed vial	0.0035
	Closed vial	0.0025
	Closed vial	0.0028
	Closed vial	0.0029
	Closed vial	0.0027
	Closed vial	0.0024
	Closed vial	0.0034
	Closed vial	0.0027
	Closed vial	0.0037
	Closed vial	0.0061
	Closed vial	0.0007
	Closed vial	0.0012
	Closed vial	0.0008
	Closed vial	0.0008
	Closed vial	0.0006
	Closed vial	0.0009
	Closed vial	0.0019
	Closed vial	0.0037
	Closed vial	0.0014
	Closed vial	0.0021

## Sheet: Data Fig 6
Data Figure 6: O2 consumption obtained from air and water of Ae. albopictus larvae in the closed vial condition.
	Medium	TM (µmoles/h)
	Air	0.0333
	Air	0.0218
	Air	0.0125
	Air	0.0187
	Air	0.0073
	Air	0.0073
	Air	0.0078
	Air	0.0062
	Air	0.0343
	Air	0.0364
	Air	0.0281
	Air	0.0333
	Air	0.0187
	Air	0.0354
	Air	0.0156
	Air	0.0198
	Air	0.0031
	Air	0.0031
	Air	0.0044
	Air	0.0028
	Air	0.0022
	Air	0.0055
	Water	0.001
	Water	0.0016
	Water	0.0035
	Water	0.0025
	Water	0.0028
	Water	0.0029
	Water	0.0027
	Water	0.0024
	Water	0.0034
	Water	0.0027
	Water	0.0037
	Water	0.0061
	Water	0.0007
	Water	0.0012
	Water	0.0008
	Water	0.0008
	Water	0.0006
	Water	0.0009
	Water	0.0019
	Water	0.0037
	Water	0.0014
	Water	0.0021

## Sheet: Data Fig 7
Data Figure 7: Total O2 consumption of Ae. albopictus larvae with (dual) and without (submerged) access to air.
	Treatment	TM (µmoles/h)
	Submerged	0.0333
	Submerged	0.0312
	Submerged	0.0168
	Submerged	0.0229
	Submerged	0.0229
	Submerged	0.025
	Submerged	0.0291
	Submerged	0.027
	Submerged	0.0198
	Submerged	0.0312
	Submerged	0.0204
	Submerged	0.0229
	Submerged	0.027
	Submerged	0.0189
	Submerged	0.0148
	Submerged	0.0185
	Submerged	0.0206
	Submerged	0.016
	Submerged	0.0102
	Submerged	0.0229
	Submerged	0.025
	Submerged	0.025
	Submerged	0.016
	Submerged	0.0229
	Submerged	0.027
	Submerged	0.0229
	Submerged	0.0146
	Submerged	0.0229
	Closed vial	0.0343
	Closed vial	0.0234
	Closed vial	0.016
	Closed vial	0.0212
	Closed vial	0.0101
	Closed vial	0.0102
	Closed vial	0.0105
	Closed vial	0.0086
	Closed vial	0.0377
	Closed vial	0.0391
	Closed vial	0.0318
	Closed vial	0.0394
	Closed vial	0.0194
	Closed vial	0.0366
	Closed vial	0.0164
	Closed vial	0.0206
	Closed vial	0.0037
	Closed vial	0.004
	Closed vial	0.0063
	Closed vial	0.0065
	Closed vial	0.0036
	Closed vial	0.0076

## Sheet: Data Q10 C
Data Q10 of Ae. albopictus submerged larvae
	Temperature (ºC)	TM (µmoles/h)
	15	0.0185
	15	0.0229
	15	0.025
	15	0.025
	15	0.011
	15	0.0106
	15	0.0081
	15	0.0156
	15	0.0073
	15	0.0037
	15	0.0096
	15	0.0181
	15	0.0158
	15	0.011
	15	0.0106
	15	0.0112
	15	0.0291
	15	0.0229
	15	0.0058
	15	0.0229
	25	0.0333
	25	0.0312
	25	0.0168
	25	0.0229
	25	0.0229
	25	0.025
	25	0.0291
	25	0.027
	25	0.0198
	25	0.0312
	25	0.0204
	25	0.0229
	25	0.027
	25	0.0189
	25	0.0148
	25	0.0185
	25	0.0206
	25	0.016
	25	0.0102
	25	0.0229
	25	0.025
	25	0.025
	25	0.016
	25	0.0229
	25	0.027
	25	0.0229
	25	0.0146
	25	0.0229
	35	0.0437
	35	0.0499
	35	0.0728
	35	0.0437
	35	0.0998
	35	0.052
	35	0.0769
	35	0.1061
	35	0.0769
	35	0.079
	35	0.0686
	35	0.0749
	35	0.0437
	35	0.0458
	35	0.0499
	35	0.0458
	35	0.0312
	35	0.1289
	35	0.0686
	35	0.0894
